# Supplementary material for: A novel synthetic strategy for hexanuclear supramolecular architecturesElectronic supplementary information (ESI) available: synthesis and single crystal X-ray diffraction. See http://www.rsc.org/suppdata/cc/b3/b300605k/
Source: Royal Society of Chemistry journal article supplement (doi:10.1039/b300605k), 2003-02-18
Supplement: b300605k.doc [file b300605k.doc]

Supplementary Information for:

A Novel Synthetic Strategy for Hexanuclear Supramolecular Architectures

Oleg V. Dolomanov, Alexander J. Blake, Neil R. Champness,* Martin Schröder and Claire Wilson

**Synthesis:**

Preparation of **L**, 6,6'-bis(4-ethynylpyridine)2,2'-bipyridine: 6,6'-dibromo-2,2'-bipyridine (0.225g, 0.72mmol), 4-ethynylpyridine (0.192g, 1.86mmol), (PPh3)2PdCl2 (5.1mg) and NEt3 (2.5ml) were placed in a high pressure tube under a nitrogen atmosphere. The reaction mixture was heated overnight at 90oC. The reaction mixture was cooled to room temperature and a minimum amount of CH2Cl2 was added to dissolve the crude product. The solution was washed several times with water, dried over Na2SO4 and filtered through a thin layer of silica gel. The solvent was evaporated and the dark-grey residue purified by column chromatography using an acetone/ethylacetate (1:1) mixture. Overall yield 65%. 1H NMR (25°C, CD3CN)**:** 7.33-7.61 (2H, m)**,** 7.62-7.72(1H, m),7.73-7.85, 7.90-8.04 (1H, m,m), 8.29-8.49 (1H, m), 8.60-8.70 (1H, m).

**1**: [Cu6L6(BF4)](BF4)*5* was prepared by reaction of equimolar amounts of [Cu(MeCN)4]BF4 and L in EtOH followed by evaporation of the solvent. Alternatively the reaction can be carried out using a 1:1 mixture of CH2Cl2 and MeCN as solvent. Red single crystal of **1** were grown by diethyl ether diffusion into a DMF solution of the complex over a period of 2 days. 1H NMR (25°C, CD3CN)**:** 7.44 (2H, d, *2J*HH= 5.4), 7.96 (1H, d, *2JHH*= 7.8), 8.25 (1H, t, *2J*HH = 8.1), 8.54 (1H, d, *2J*HH= 7.8), 8.65 (1H, d, *2J*HH= 5.5). Electrospray mass spec. (MeOH/CH2Cl2): 930 {[Cu6L6(BF4)*n*]3+}, 676 {[Cu6L6(BF4)*n*]4+}, 523 {[Cu6L6(BF4)*n*]5+} and 422 {[Cu6L6(BF4)*n*]6+}. Found: C, 51.05; H, 2.71; N, 9.53. Calc. for C25H16BcuF4N4Cl2 (**1**. 6 CH2Cl2): C, 50.53; H, 2.69; N, 9.43%.

**2**: [Ag6L6(BF4)](BF4)*5* was prepared by reaction of equimolar amounts of AgBF4 in MeOH with L in CHCl3 followed by evaporation of the solvent. Alternatively the reaction can be carried out using a 1:1 mixture of CH2Cl2 and MeCN as solvent. Single crystals of **2** were grown by diethyl ether diffusion into a DMF solution of the complex over a period of 2 days. 1H NMR (25°C, CD3CN)**:** 6.99 (4H, dd, *2J*HH = 1.5, *3J*HH = 6.1Hz), 7.78 (2H, dd, *2J*HH = 1.0, *3J*HH = 8.8), 8.02 (2H, t, *2J*HH = 8.1), 8.19 (2H, dd *2J*HH = 1.0, *3J*HH = 8.8), 8.44 (4H, dd *2J*HH = 1.5 *3J*HH = 5.9). Electrospray mass spec. (MeOH): 467 [(AgL)+]. Found: C, 50.15; H, 2.66; N, 11.02. Calc. for C25H15.5AgBF4N4.5 (**2**. 3 MeCN): C, 52.31; H, 2.70; N, 10.98%. Repeated elemental analysis of sample of **2** gave varying values for C, H and N content. This can be accounted for by the large channels generated by the solid state structure which can accommodate large amounts of solvent of varying composition.

**3**: [Ag6L6(SbF6)](SbF6)*5* was prepared by reaction of equimolar amounts of AgSbF6 in MeCN with L in CHCl3 followed by evaporation of the solvent. Single crystals of **3** were grown by vapour phase diethyl ether diffusion into an MeCN solution of the complex over a period of 2 days. 1H NMR (25°C, CD3CN): 7.29 (4H, m), 7.87 (2H, d, *2J*HH = 7.9), 7.18 (2H, t, *2J*HH = 7.9), 8.38 (2H, d, *2J*HH = 7.9), 8.57 (4H, d *2J*HH = 5.0). Found: C, 40.19; H, 1.96; N, 8.89. Calc. for C29H21AgF6N6SbCl3 (**3**. 6 CHCl3): C, 38.51; H, 2.32; N, 9.29%. Electrospray mass spec. (MeOH): no peaks corresponding to (AgL)+ complexes were observed. Repeated elemental analysis of sample of **3** gave varying values for C, H and N content. This can be accounted for by the large channels generated by the solid state structure which can accommodate large amounts of solvent of varying composition.

**4**: [Ag6L6(BF4)][Co(C2H11B9)2]5 was prepared by reacting equimolar quantities of AgBF4 and Na[Co(C2H11B9)2] in MeCN with a solution of L in CH2Cl2. Single crystals were grown by slow solvent diffusion of these solutions. 1H NMR (25°C, CD3CN) spectra were essentially identical to those observed for **2**.

**5**: (AgL)2[Co(C2H11B9)2]2 was prepared by reacting equimolar quantities of Ag[Co(C2H11B9)2] with L in MeCN. Single crystals were grown by solvent diffusion of water into an MeCN solution of the complex. 1H NMR (25°C, CD3CN) spectra were essentially identical to those observed for **2**.

Repeated attempts to obtain satisfactory elemental analysis for **4** and **5** proved unsuccessful with particularly low values for carbon percentages. We attribute this to an incomplete combustion processes. Similar phenomena have been observed with related Ag[Co(C2H11B9)2]-polypyridyl complexes in our laboratories.

**Single crystal X-ray diffraction:**

Diffraction data were collected at 150 K (**1**-**4**) or 120K (**5**) on a Bruker SMART1000 CCD diffractometer equipped with an Oxford Cryosystems open-flow cryostat, employing graphite‑monochromated Mo-*K* radiation ( = 0.71073 Å) and  scans or synchrotron radiation (** = 0.6900 Å) for compound **5**. Absorption corrections based upon symmetry equivalent reflections were applied to the data. The structures were solved using direct methods and all non-hydrogen atoms were located using subsequent difference-Fourier methods. Hydrogen atoms on pyridyl rings were placed in calculated positions and refined in riding mode. All non-H atoms were refined with anisotropic displacement parameters. All three structures had further complications which are dealt with below on an individual basis.

Refinement details for **1**:

Distance and similarity restraints were applied to B-F bonds. The PLATON SQUEEZE procedure was used to treat regions of diffuse solvent which could not be sensibly modelled in terms of atomic sites. Their contribution to the diffraction pattern was removed and modified *F*o2 written to a new HKL file. The number of electrons thus located, 1791 per unit cell, are included in the formula, formula weight, calculated density,  and F(000). This residual electron density was assigned to two molecules of the DMF solvent and 0.3367 counteranions [1791/18 = 100 e per ligand; 100 – 41x0.3367 (BF4-) = 87 e. Two molecules of DMF would give 80 e.].

Refinement details for **2:**

Distance and similarity restraints were applied to B-F bonds. After failing to model regions of diffuse electron density, we resorted to the PLATON SQUEEZE procedure. This removed the contribution of the diffuse regions to the diffraction pattern and gave a new HKL file. The number of electrons thus estimated were included in the final formula, formula weight, calculated density, mu and F(000) is 2690 per unit cell. The residual electron density was assigned to three molecules of the DMF solvent and half a counter-anion [2690/18 = 150 e per ligand molecule. 150 – 41x0.5(BF4) = 130 e. Three molecules of DMF would give 120 e.].

Refinement details for **3:**

Similarity restraints were applied to Sb-F distances in the SbF6- anion. All non-H atoms were refined anisotropically. Acetonitrile hydrogens could not be located from the Fourier synthesis and are not included in the refinement model. However, they are included in the calculation of the formula weight, etc.. As expected, the largest electron density extrema lie near the Sb atoms. Rigid-bond restraints were applied to anisotropic displacement parameters. The original dataset was truncated to 2 of 50 degrees as higher-angle reflections had no significant intensity.

Refinement details for **4:**

The cobaltocarborate anions were refined using extensive distance and similarity restraints. The BF4- anion is partially disordered and two F atoms were modelled across three 2/3-occupied sites.

Refinement details for **5:**

There is some sort of minor disorder affecting C7 and C8 which affects the length of the triple bond. The disorder has not been modelled as there is no obvious solution.
